# Supplementary material
Source: ML conference proceedings conference paper supplement (https://openreview.net/forum?id=YIGUv0BZCy)

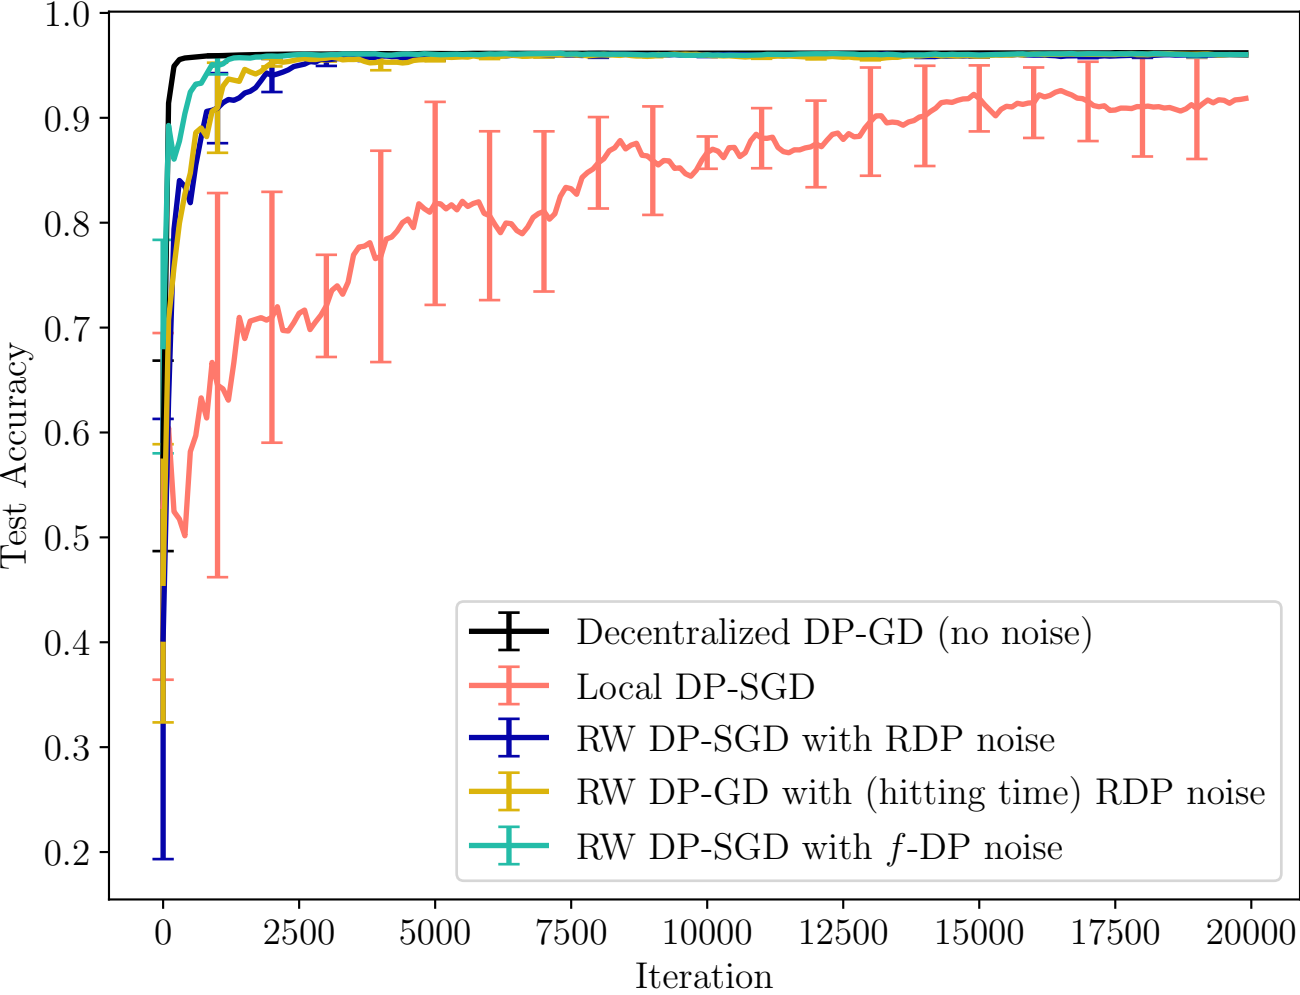

Supplement: supplementary_material [file accuracy-exp11.pdf › decemtralized/private logistic reg/result/accuracy-exp11.pdf]

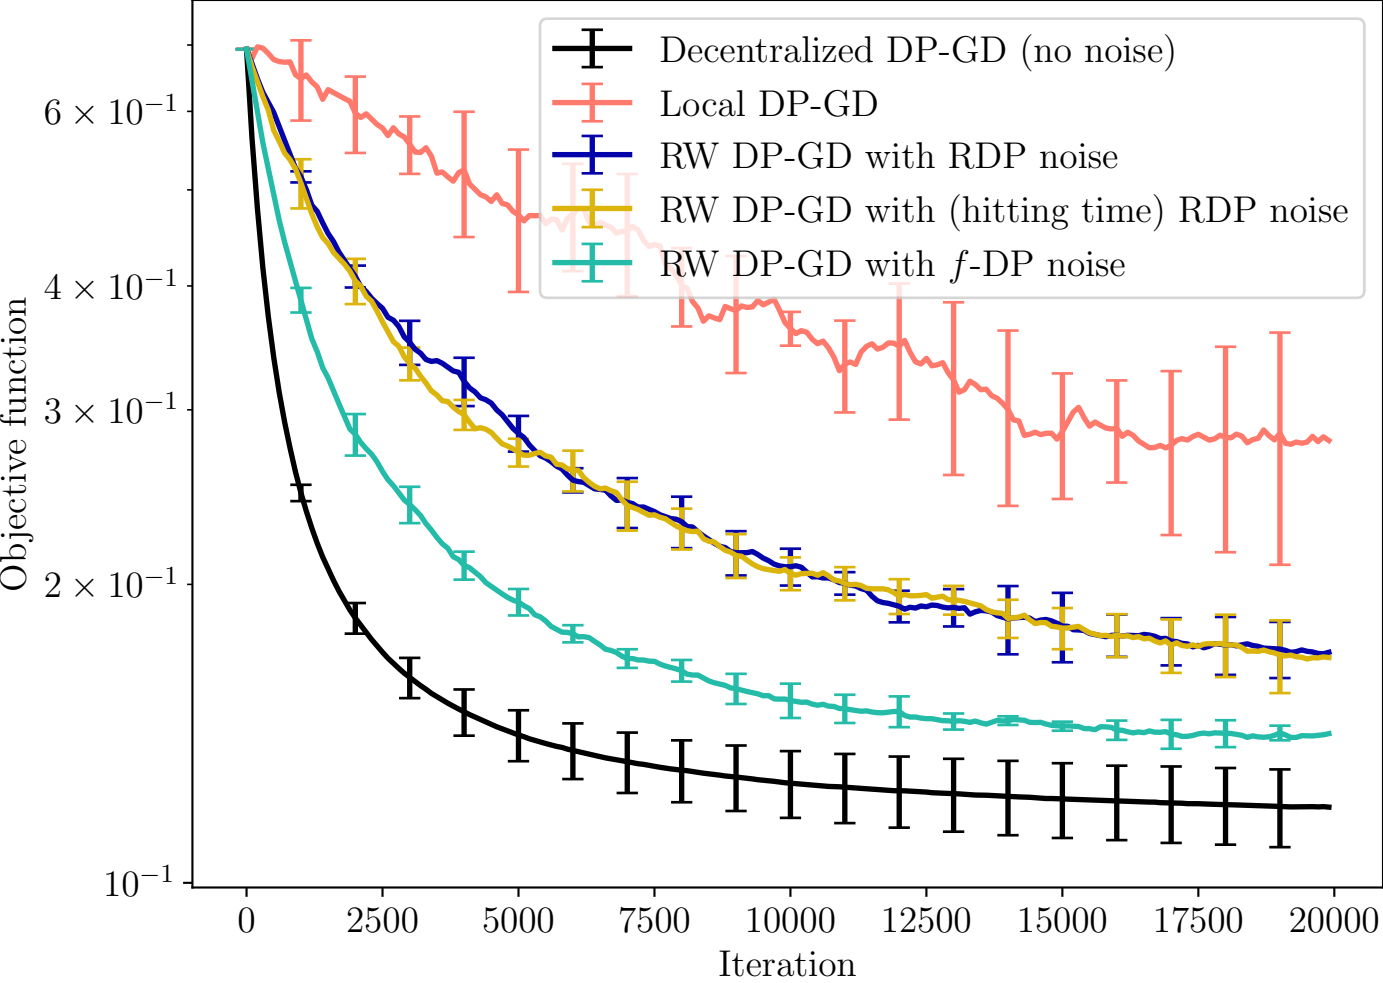

Supplement: supplementary_material [file objfun-exp11.pdf › decemtralized/private logistic reg/result/objfun-exp11.pdf]
